# Supplementary material
Source: PubMed Central journal article supplement (PMC3413333)
Supplement: NIHMS392738-supplement-Supp_Fig_S1-S7.pdf [file NIHMS392738-supplement-Supp_Fig_S1-S7.pdf]

**SUM159PT**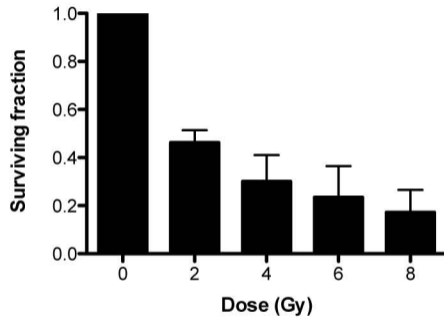**MCF-7**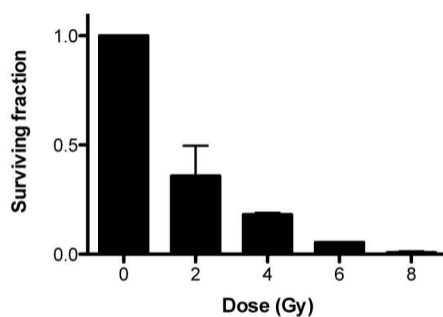**T47D**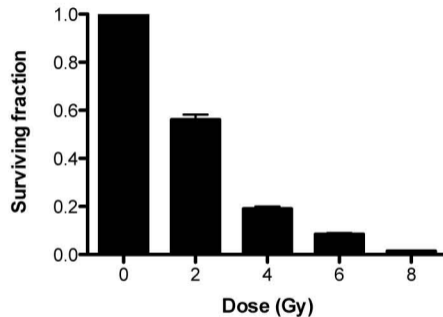**Supplementary Figure 1****Lagadec *et al.***



**a.****T47D**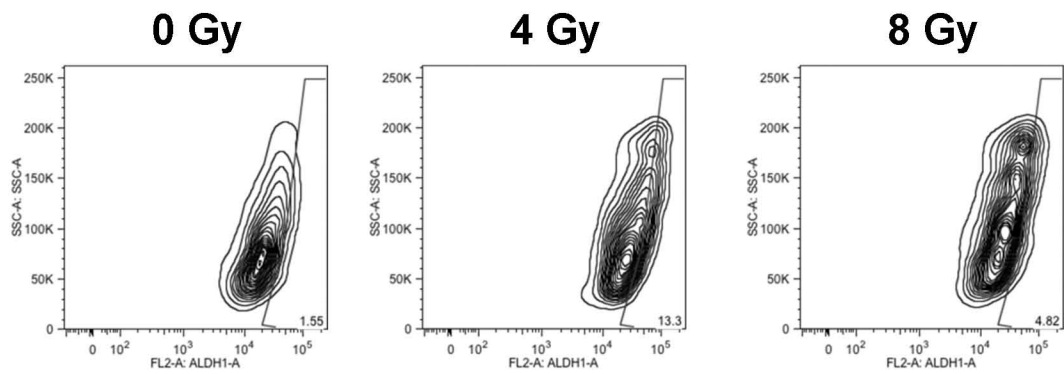**b.****SUM159 Sphere 1st G**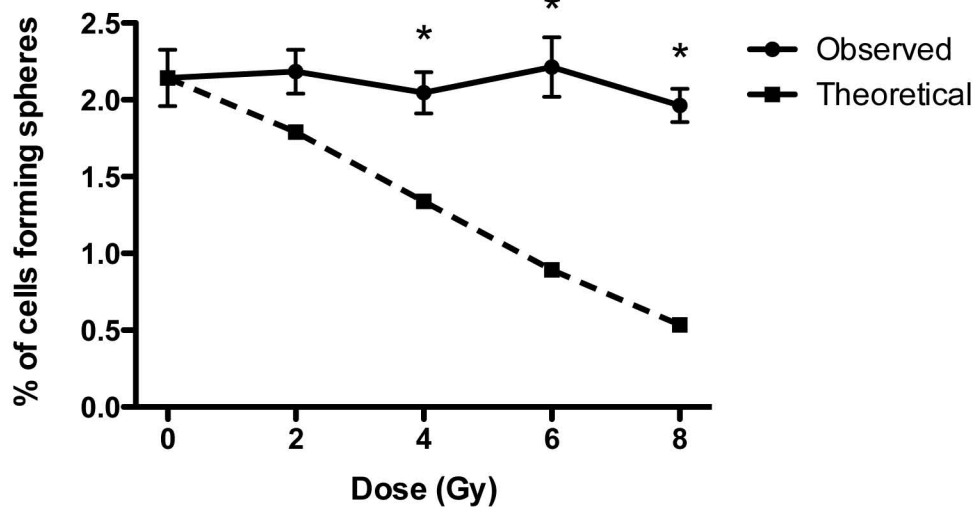**SUM159 Sphere 2nd G**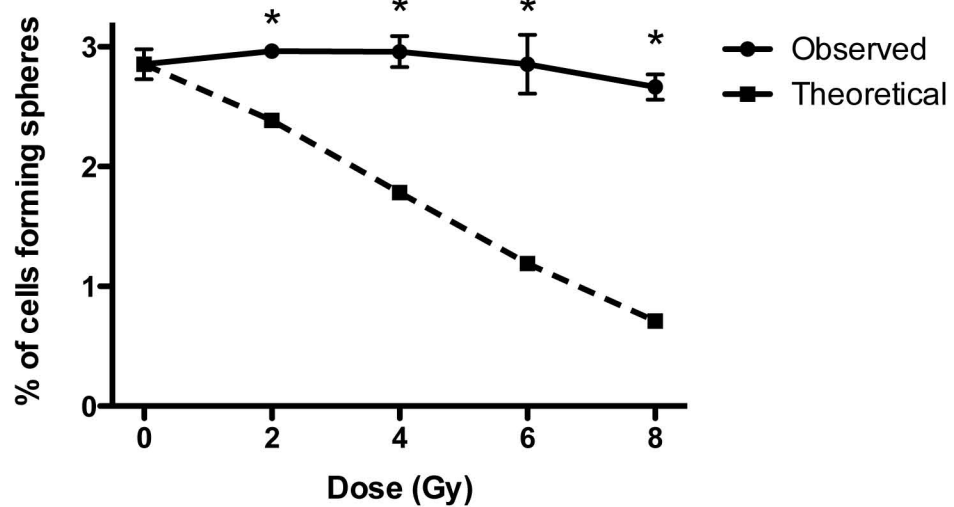**MCF-7 Sphere 1st G**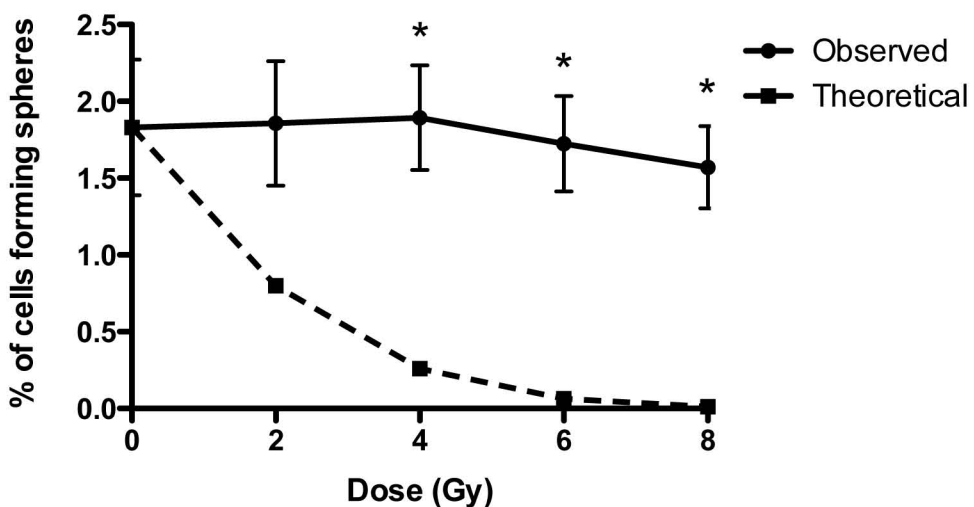**MCF-7 Sphere 2nd G**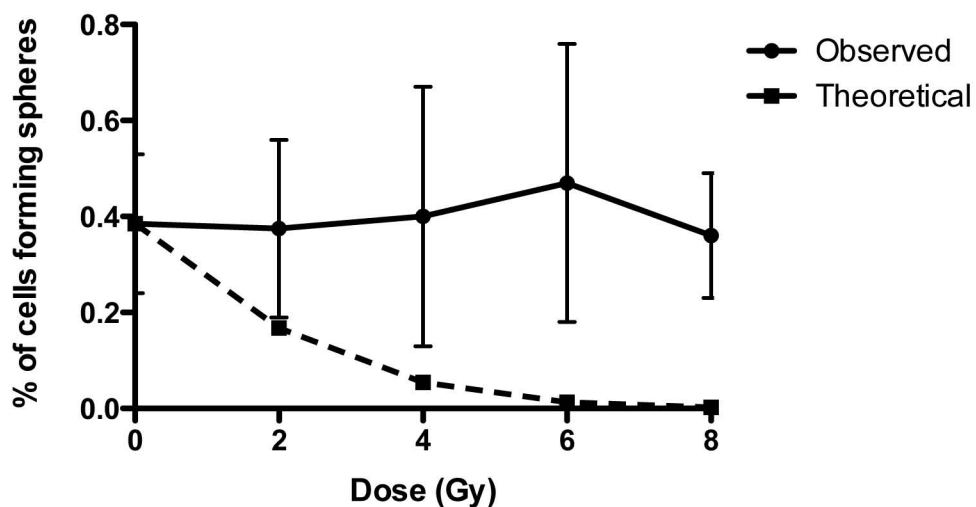**T47D Sphere 1st G**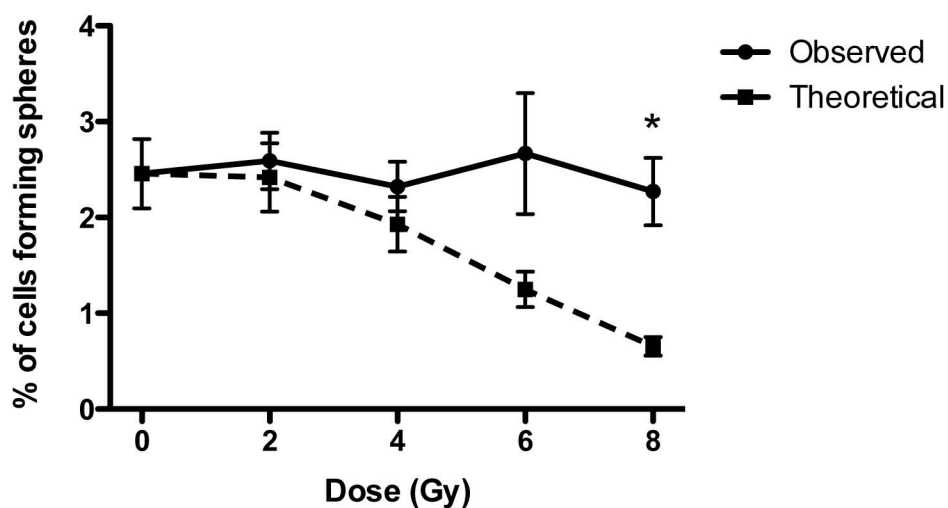**T47D Sphere 2nd G**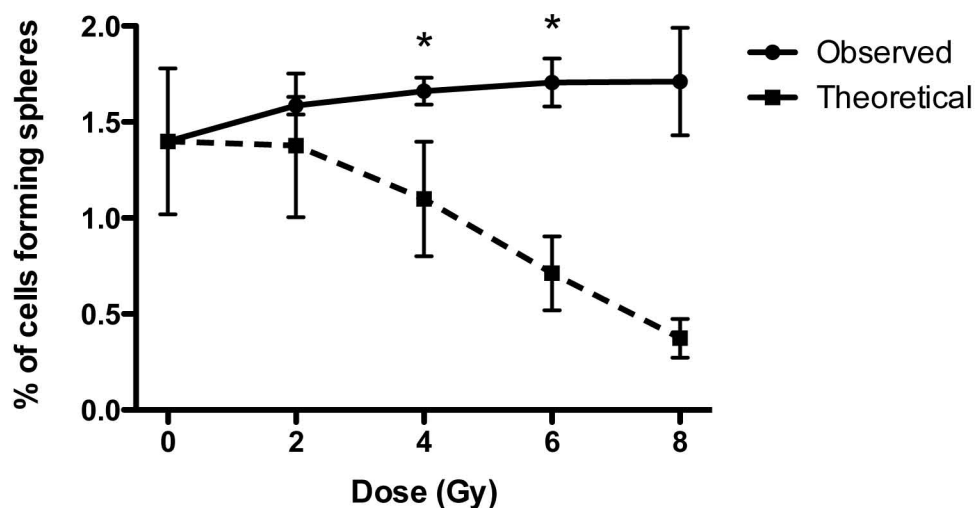

| Accession nb | Symbol | Description | Function                                                  | Relative expression to the mean |      |          |      |         |          |       |
|--------------|--------|-------------|-----------------------------------------------------------|---------------------------------|------|----------|------|---------|----------|-------|
|              |        |             |                                                           | ZsG-                            | ZsG+ | ZsG+ 8Gy | ZsG- | ZsG+    | ZsG+ 8Gy |       |
| 1            | P48431 | SOX2        | SRY (sex determining region Y)-box 2                      | Stemness                        |      |          |      | 0.04    | 1.11     | 21.09 |
| 2            | P04234 | CD3D        | CD3d molecule, delta (CD3-TCR complex)                    | Immunity                        |      |          |      | 0.08    | 0.80     | 14.76 |
| 3            | O00570 | SOX1        | SRY (sex determining region Y)-box 1                      | Stemness                        |      |          |      | 0.13    | 1.02     | 7.85  |
| 4            | P20849 | COL9A1      | collagen, type IX, alpha 1                                | ECM                             |      |          |      | 0.14    | 1.60     | 4.59  |
| 5            | P04628 | WNT1        | Wingless-type MMTV integration site family, member 1      | Growth Factor / Wnt             |      |          |      | 0.15    | 1.64     | 4.17  |
| 6            | P11487 | FGF3        | fibroblast growth factor 3                                | Growth Factor / FGF / Heparine  |      |          |      | 0.15    | 2.92     | 2.35  |
| 7            | P16112 | ACAN        | aggrecan                                                  | ECM / hyaluronic acid           |      |          |      | 0.17    | 1.46     | 3.94  |
| 8            | Q9NR23 | GDF3        | Growth differentiation factor 3                           | Stemness / BMP                  |      |          |      | 0.34    | 0.49     | 5.97  |
| 9            | P12645 | BMP3        | bone morphogenetic protein 3                              | Stemness / BMP                  |      |          |      | 0.34    | 0.73     | 4.00  |
| 10           | P15172 | MYOD1       | myogenic differentiation 1                                | Stemness                        |      |          |      | 0.36    | 12.05    | 0.23  |
| 11           | Q9NPB6 | PARD6A      | par-6 partitioning defective 6 homolog alpha (C. elegans) | Junction                        |      |          |      | 0.39    | 0.45     | 5.75  |
| 12           | P04271 | S100B       | S100 calcium binding protein B                            | Calcium metabolism              |      |          |      | 0.39    | 0.28     | 9.21  |
| 13           | Q9Y297 | BTRC        | Beta-transducin repeat containing                         | Growth Factor / Wnt / Ub        |      |          |      | 0.44    | 2.51     | 0.90  |
| 14           | P12643 | BMP2        | bone morphogenetic protein 2                              | Stemness / BMP                  |      |          |      | 0.47    | 0.90     | 2.35  |
| 15           | O00548 | DLL1        | delta-like 1 (Drosophila)                                 | Growth Factor / Notch           |      |          |      | 0.49    | 0.84     | 2.41  |
| 16           | P05091 | ALDH2       | aldehyde dehydrogenase 2 family (mitochondrial)           | Detox                           |      |          |      | 0.51    | 0.73     | 2.72  |
| 17           | P06493 | CDC2        | cell division cycle 2, G1 to S and G2 to M                | cell Cycle                      |      |          |      | 0.51    | 1.24     | 1.58  |
| 18           | O43323 | DHH         | Desert hedgehog homolog (Drosophila)                      | Growth Factor / HHg             |      |          |      | 0.60    | 2.08     | 0.80  |
| 19           | Q92837 | FRAT1       | frequently rearranged in advanced T-cell lymphomas        | Growth Factor / Wnt             |      |          |      | 0.61    | 1.06     | 1.56  |
| 20           | Q86UW9 | DTX2        | Deltex homolog 2 (Drosophila)                             | Growth Factor / Notch / Ub      |      |          |      | 0.61    | 0.89     | 1.86  |
| 21           | P08473 | MME         | membrane metallo-endopeptidase                            | ECM                             |      |          |      | 0.68    | 0.85     | 1.75  |
| 22           | Q9Y261 | FOXA2       | forkhead box A2                                           | Stemness                        |      |          |      | 0.68    | 1.04     | 1.40  |
| 23           | P05230 | FGF1        | Fibroblast growth factor 1                                | Growth Factor / FGF / Heparine  |      |          |      | 0.70    | 1.38     | 1.04  |
| 24           | P29033 | GJB2        | gap junction protein, beta 2, 26kDa                       | Junction                        |      |          |      | 0.74    | 1.13     | 1.20  |
| 25           | P05019 | IGF1        | insulin-like growth factor 1 (somatomedin C)              | Growth Factor / IGF             |      |          |      | 0.74    | 0.81     | 1.66  |
| 26           | P28360 | MSX1        | msh homeobox 1                                            | Stemness                        |      |          |      | 0.75    | 0.98     | 1.36  |
| 27           | P20248 | CCNA2       | cyclin A2                                                 | cell Cycle                      |      |          |      | 0.75    | 1.55     | 0.86  |
| 28           | Q13509 | TUBB3       | Tubulin, beta 3                                           | Cytosq                          |      |          |      | 0.76    | 1.39     | 0.95  |
| 29           | P01106 | MYC         | v-myc myelocytomatosis viral oncogene homolog (avian)     | Cell cycle / stemness           |      |          |      | 0.78    | 0.91     | 1.41  |
| 30           | Q95251 | MYST2       | MYST histone acetyltransferase 2                          | HDAC                            |      |          |      | 0.78    | 0.98     | 1.31  |
| 31           | Q09472 | EP300       | E1A binding protein p300                                  | Growth Factor / Notch           |      |          |      | 0.80    | 0.84     | 1.50  |
| 32           | Q86Y01 | DTX1        | deltex homolog 1 (Drosophila)                             | Growth Factor / Notch / Ub      |      |          |      | 0.80    | 0.19     | 6.46  |
| 33           | P46531 | NOTCH1      | Notch homolog 1, translocation-associated (Drosophila)    | Growth Factor / Notch           |      |          |      | 0.82    | 1.01     | 1.20  |
| 34           | P17302 | GJA1        | Gap junction protein, alpha 1, 43kDa                      | Junction                        |      |          |      | 0.84    | 1.34     | 0.89  |
| 35           | P11362 | FGFR1       | Fibroblast growth factor receptor 1                       | Growth Factor / FGF / Heparine  |      |          |      | 0.84    | 1.48     | 0.81  |
| 36           | P24864 | CCNE1       | Cyclin E1                                                 | cell Cycle                      |      |          |      | 0.84    | 1.19     | 1.00  |
| 37           | P16070 | CD44        | CD44 molecule (Indian blood group)                        | Stemness / Hyaluronic acid      |      |          |      | 0.85    | 1.38     | 0.86  |
| 38           | Q5VT25 | CDC42BPA    | CDC42 binding protein kinase alpha                        | Cytosq                          |      |          |      | 0.86    | 1.32     | 0.87  |
| 39           | Q92830 | KAT2A       | K(lysine) acetyltransferase 2A                            | HDAC                            |      |          |      | 0.87    | 0.89     | 1.29  |
| 40           | P19022 | CDH2        | Cadherin 2, type 1, N-cadherin (neuronal)                 | Adhesion                        |      |          |      | 0.87    | 1.90     | 0.60  |
| 41           | P09038 | FGF2        | Fibroblast growth factor 2 (basic)                        | Growth Factor / FGF / Heparine  |      |          |      | 0.87    | 1.73     | 0.66  |
| 42           | O14746 | TERT        | Telomerase reverse transcriptase                          | Growth Factor / Wnt             |      |          |      | 0.89    | 1.02     | 1.10  |
| 43           | O15169 | AXIN1       | axin 1                                                    | Growth Factor / Wnt / Ub        |      |          |      | 0.91    | 1.01     | 1.09  |
| 44           | P78563 | ADARB1      | adenosine deaminase, RNA-specific, B1                     | RNA metabolism                  |      |          |      | 0.91    | 1.08     | 1.03  |
| 45           | P37231 | PPARG       | peroxisome proliferator-activated receptor gamma          | Fatty acid                      |      |          |      | 0.93    | 0.94     | 1.15  |
| 46           | Q9UM13 | ANAPC10     | anaphase promoting complex subunit 10                     | Cell Cycle / Ub                 |      |          |      | 0.93    | 0.73     | 1.48  |
| 47           | Q92769 | HDAC2       | Histone deacetylase 2                                     | HDAC                            |      |          |      | 0.94    | 1.15     | 0.92  |
| 48           | Q9NRR8 | CDC42       | Cell division cycle 42                                    | Cell cycle                      |      |          |      | 0.95    | 1.03     | 1.02  |
| 49           | P24385 | CCND1       | Cyclin D1                                                 | cell Cycle                      |      |          |      | 0.95    | 1.03     | 1.02  |
| 50           | Q99720 | OPRS1       | opioid receptor, sigma 1                                  | Growth Factor / EGF             |      |          |      | 0.97    | 1.05     | 0.98  |
| 51           | Q9UNQ0 | ABCG2       | ATP-binding cassette, sub-family G (WHITE), member 2      | Detox                           |      |          |      | 0.97    | 1.41     | 0.73  |
| 52           | P06400 | RB1         | retinoblastoma 1                                          | Cell cycle                      |      |          |      | 0.97    | 1.01     | 1.02  |
| 53           | Q03181 | PPARD       | peroxisome proliferator-activated receptor delta          | Fatty acid                      |      |          |      | 0.99    | 0.90     | 1.12  |
| 54           | Q9UP38 | FZD1        | frizzled homolog 1 (Drosophila)                           | Growth Factor / Wnt             |      |          |      | 0.99    | 1.29     | 0.78  |
| 55           | P30279 | CCND2       | cyclin D2                                                 | Cell cycle                      |      |          |      | 1.03    | 0.62     | 1.58  |
| 56           | P38646 | HSPA9       | Heat shock 70kDa protein 9                                | Cell cycle / stemness           |      |          |      | 1.09    | 1.16     | 0.79  |
| 57           | P02452 | COL1A1      | collagen, type I, alpha 1                                 | ECM                             |      |          |      | 1.10    | 3.54     | 0.26  |
| 58           | P02458 | COL2A1      | Collagen, type II, alpha 1                                | ECM                             |      |          |      | 1.23    | 2.87     | 0.28  |
| 59           | P19012 | KRT15       | Keratin 15                                                | Cytosq                          |      |          |      | 1.28    | 1.80     | 0.44  |
| 60           | P00352 | ALDH1A1     | aldehyde dehydrogenase 1 family, member A1                | Detox                           |      |          |      | 2.22    | 4.14     | 0.11  |
| 61           | P12830 | CDH1        | cadherin 1, type 1, E-cadherin (epithelial)               | Adhesion                        |      |          |      | 2.54    | 0.20     | 1.93  |
| 62           | P08034 | GJB1        | gap junction protein, beta 1, 32kDa                       | Junction                        |      |          |      | 8.27    | 0.08     | 1.46  |
| 63           | Q8WWH4 | ALPI        | alkaline phosphatase, intestinal                          | RNA metabolism                  |      |          |      | 2891.02 | 0.00     | 11.96 |

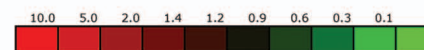

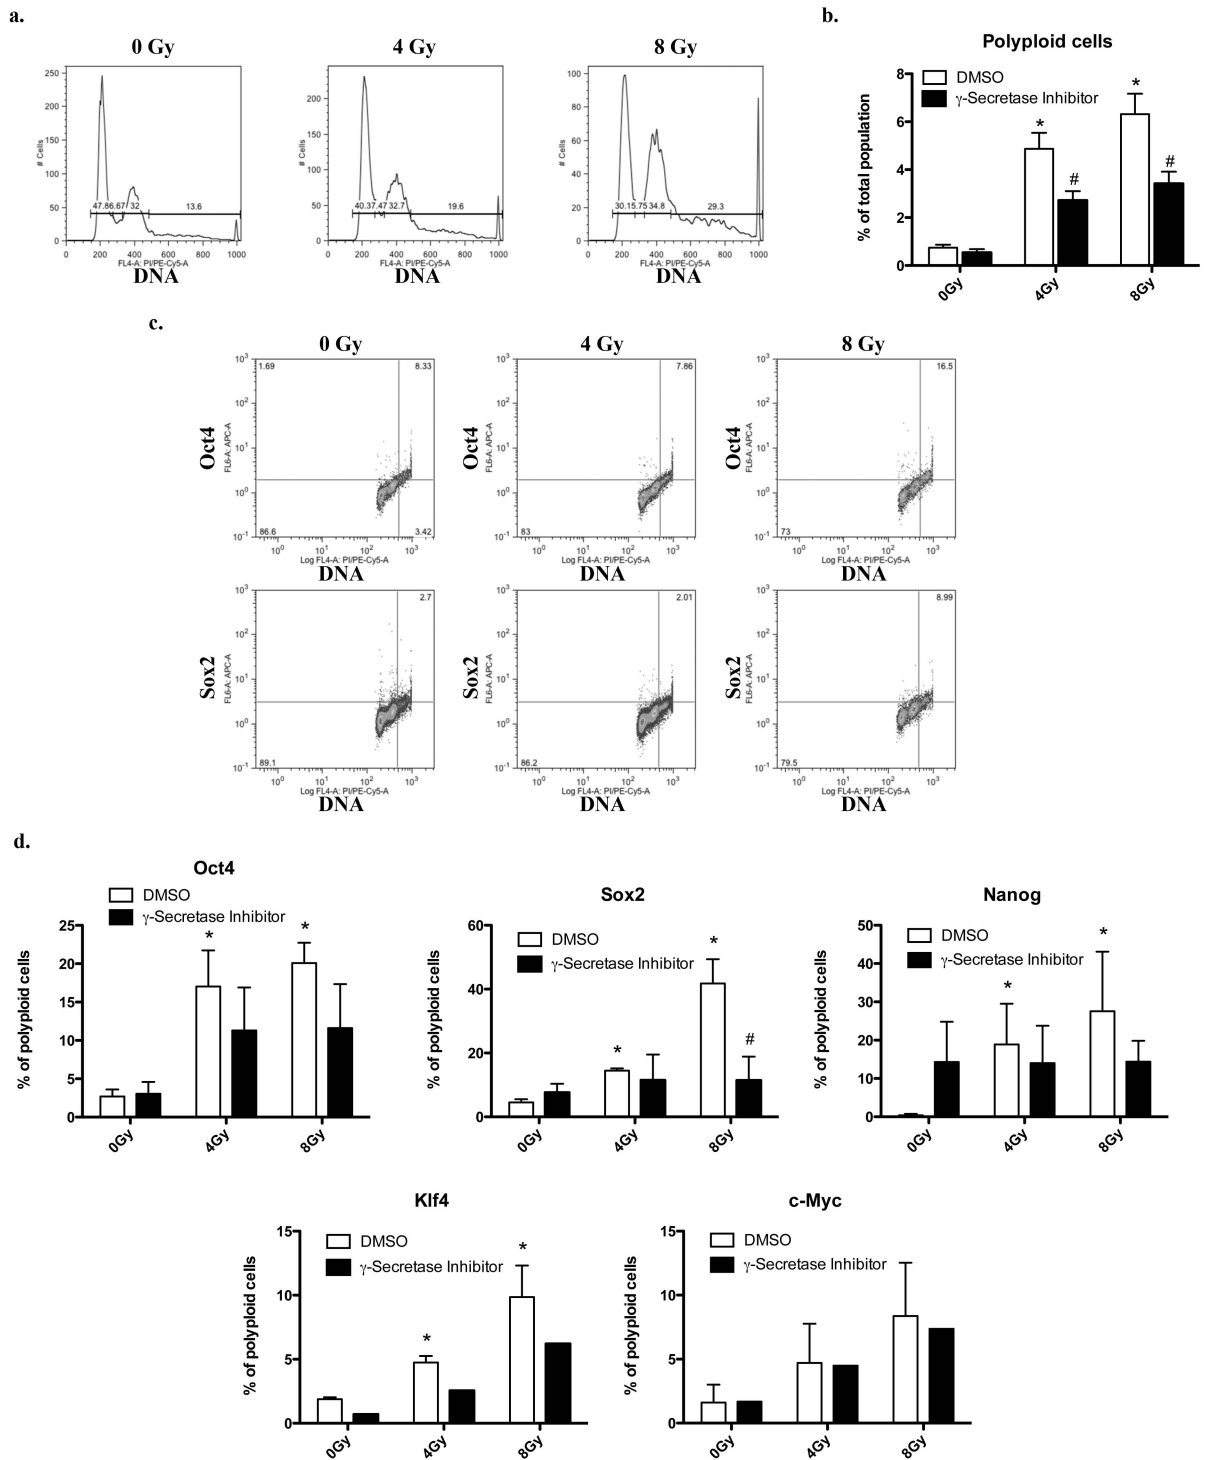

Supplementary Figure 5

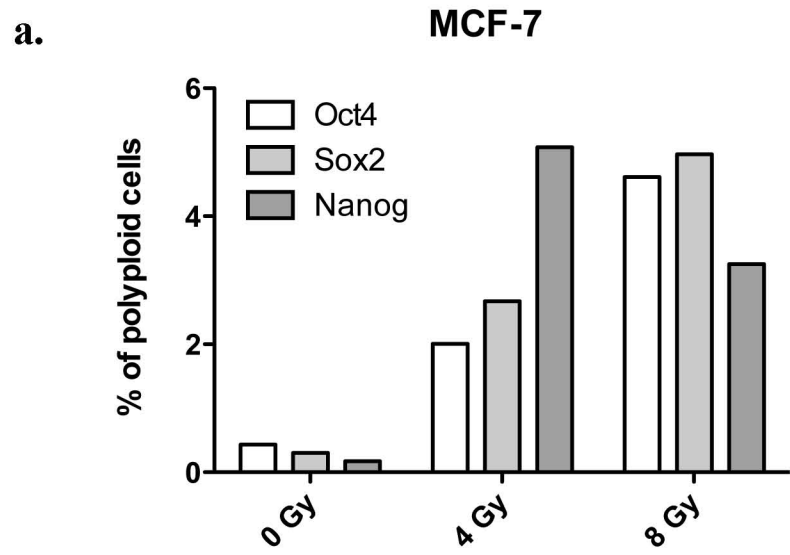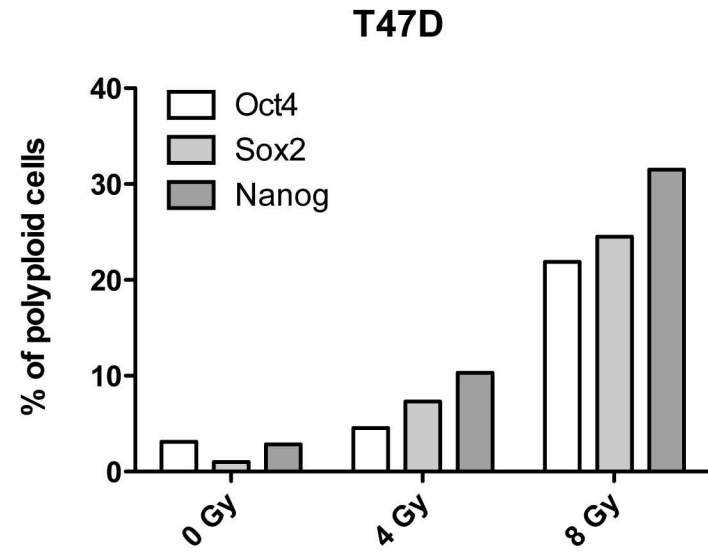

**b.**

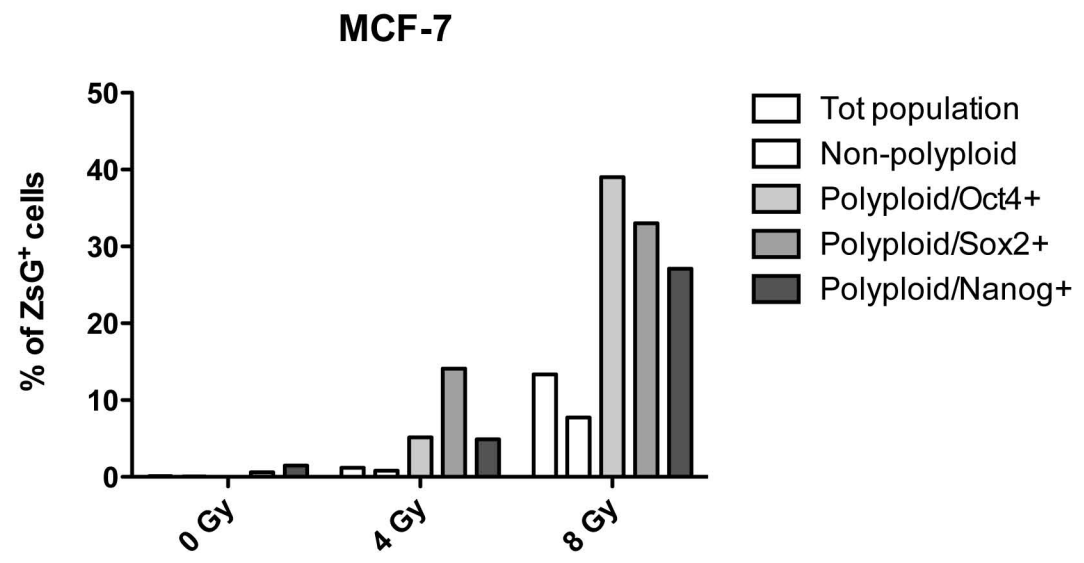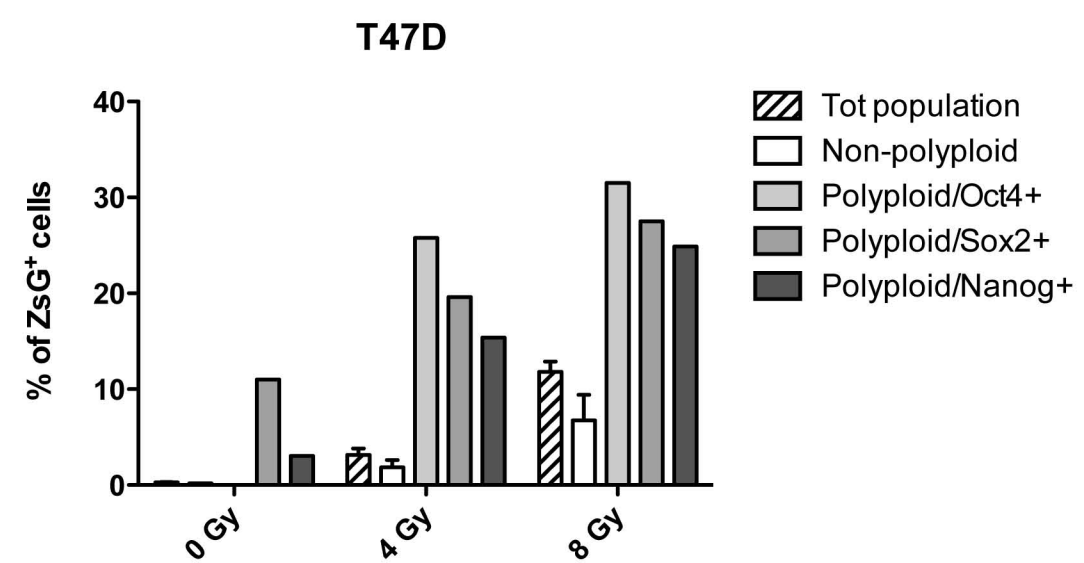

Supplementary Figure 6

**a.**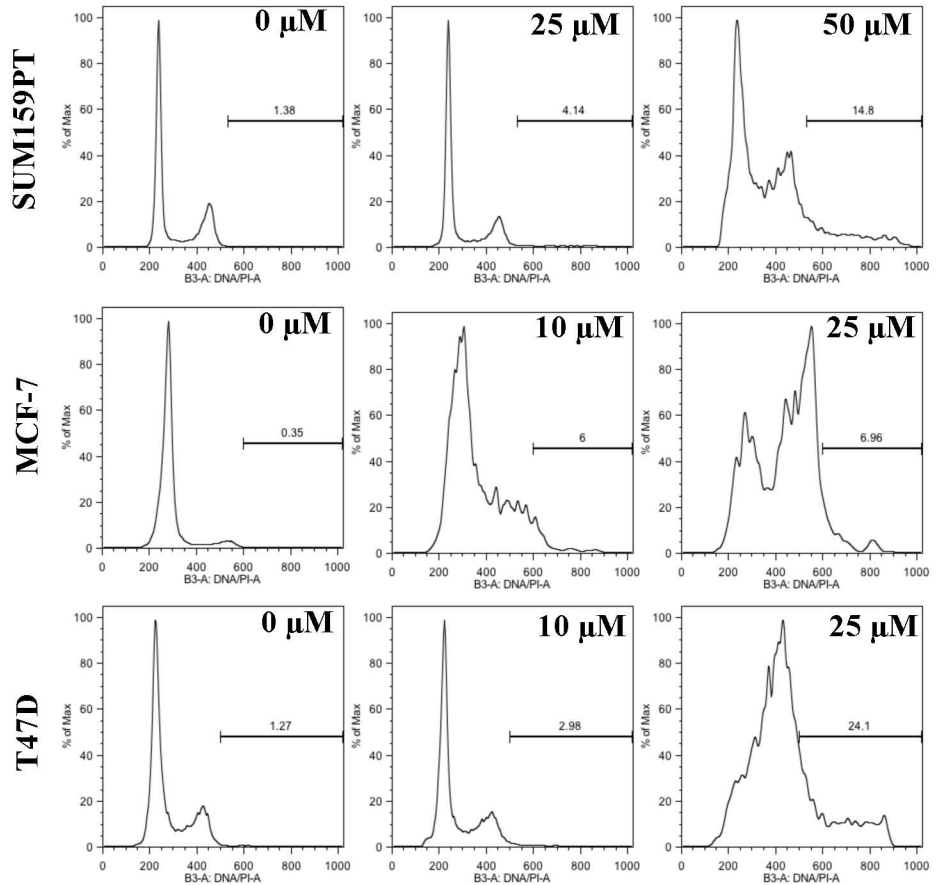**b.**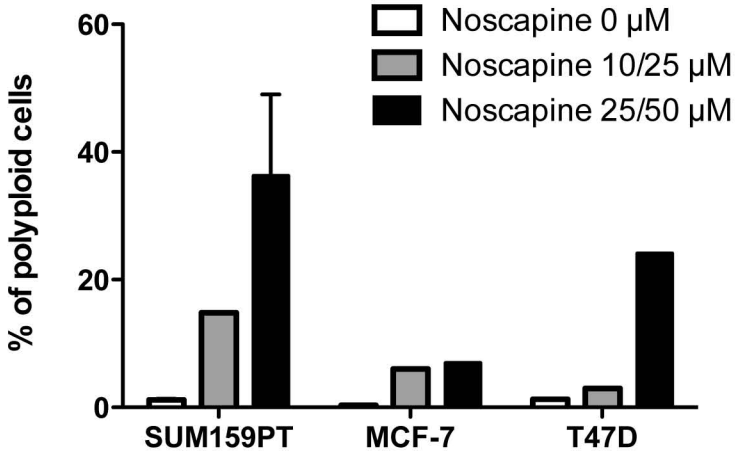**c.**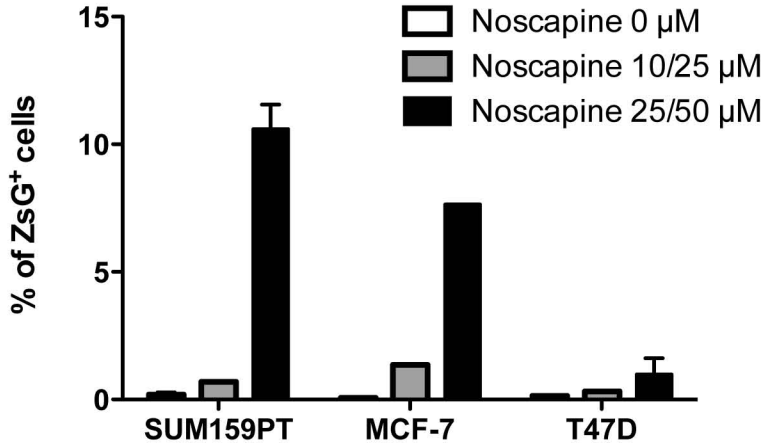**Supplementary Figure 7**
